# Supplementary material for: Left ventricular assessment with artificial intelligence increases the diagnostic accuracy of stress echocardiography
Source: Eur Heart J Open. 2022 Sep 21;2(5):oeac059. doi: 10.1093/ehjopen/oeac059 (PMC9580364; doi:10.1093/ehjopen/oeac059)

## Supplemental File

### **Left ventricular ejection fraction and global longitudinal strain calculated by artificial intelligence increases diagnostic accuracy of stress echocardiography**

Jamie M. O'Driscoll<sup>1,2,3\*</sup>, William Hawkes<sup>1\*</sup>, Arian Beqiri<sup>1</sup>, Angela Mumith<sup>1</sup>, Andrew Parker<sup>1</sup>, Ross Upton<sup>1,4</sup>, Annabelle McCourt<sup>4</sup>, William Woodward<sup>4</sup>, Cameron Dockerill<sup>4</sup>, Nikant Sabharwal<sup>5</sup>, Attila Kardos<sup>6</sup>, Daniel X Augustine<sup>7,8</sup>, Katrin Balkhausen<sup>9</sup>, Badrinathan Chandrasekaran<sup>10</sup>, Soroosh Firoozan<sup>11</sup>, Anna Marciniak<sup>3</sup>, Stephen Heitner<sup>12</sup>, Mrinal Yadava<sup>12</sup>, Sanjiv Kaul<sup>12</sup>, Rizwan Sarwar<sup>1,4,13,14</sup>, Rajan Sharma<sup>3</sup>, Gary Woodward<sup>1</sup> and Paul Leeson<sup>4</sup>

<sup>1</sup>Ultromics Ltd, 4630 Kingsgate, Cascade Way, Oxford Business Park South, Oxford, OX4 2SU.

<sup>2</sup>Canterbury Christ Church University, School of Psychology and Life Sciences, North Holmes Road, Kent, CT1 1QT.

<sup>3</sup>Department of Cardiology, St George's University Hospitals NHS Foundation Trust, Blackshaw Road, Tooting, London, SW17 0QT.

<sup>4</sup>Cardiovascular Clinical Research Facility, Radcliffe Department of Medicine, Division of Cardiovascular Medicine, University of Oxford, John Radcliffe Hospital, Oxford, UK.

<sup>5</sup>Oxford Heart Centre, Oxford University Hospitals NHS Foundation Trust, Oxford, UK.

<sup>6</sup>Department of Cardiology, Milton Keynes University Hospital NHS Foundation Trust, Milton Keynes, UK.

<sup>7</sup>Department of Cardiology, Royal United Hospitals NHS Foundation Trust, Bath, UK.

<sup>8</sup>Department for Health, University of Bath, Bath, UK.

<sup>9</sup>Department of Cardiology, Royal Berkshire NHS Foundation Trust, Reading, UK.

<sup>10</sup>Department of Cardiology, Great Western Hospitals NHS Foundation Trust, Swindon, UK.

<sup>11</sup>Department of Cardiology, Buckinghamshire Healthcare NHS Trust, High Wycombe, UK.

<sup>12</sup>Knight Cardiovascular Institute, Oregon Health & Science University, Portland, Oregon, USA.

<sup>13</sup>Experimental Therapeutics, Radcliffe Department of Medicine, University of Oxford, John Radcliffe Hospital, Oxford, UK.

<sup>14</sup>Cardiology Department, Oxford University Hospitals NHS Foundation Trust, Oxford, UK.

**Running title:** AI-calculated LVEF and GLS in stress echocardiography

**Correspondence to:** Professor Paul Leeson, Oxford Cardiovascular Clinical Research Facility, RDM Division of Cardiovascular Medicine, John Radcliffe Hospital, Oxford. OX3 9DU. E-mail: [paul.leeson@cardiov.ox.ac.uk](mailto:paul.leeson@cardiov.ox.ac.uk)

## **Contents**

**Supplementary Figure 1.** Study flow diagram.

**Supplementary Table 1.** Wall motion score reproducibility.

**Supplementary Table 2.** Extent, significance and management of significant CAD in study population.

**Supplementary Table 3.** Haemodynamic response during SE.

**Supplementary Table 4.** Freedom from significant CAD between different participant groups over the 12 months.

**Supplementary Figure 2.** Comparing of the incremental benefit of incorporating AI-calculated LV systolic function at peak stress to standard clinical assessment using bootstrapping of logistic regression models.

**Supplementary Figure 1.** Study flow diagram.

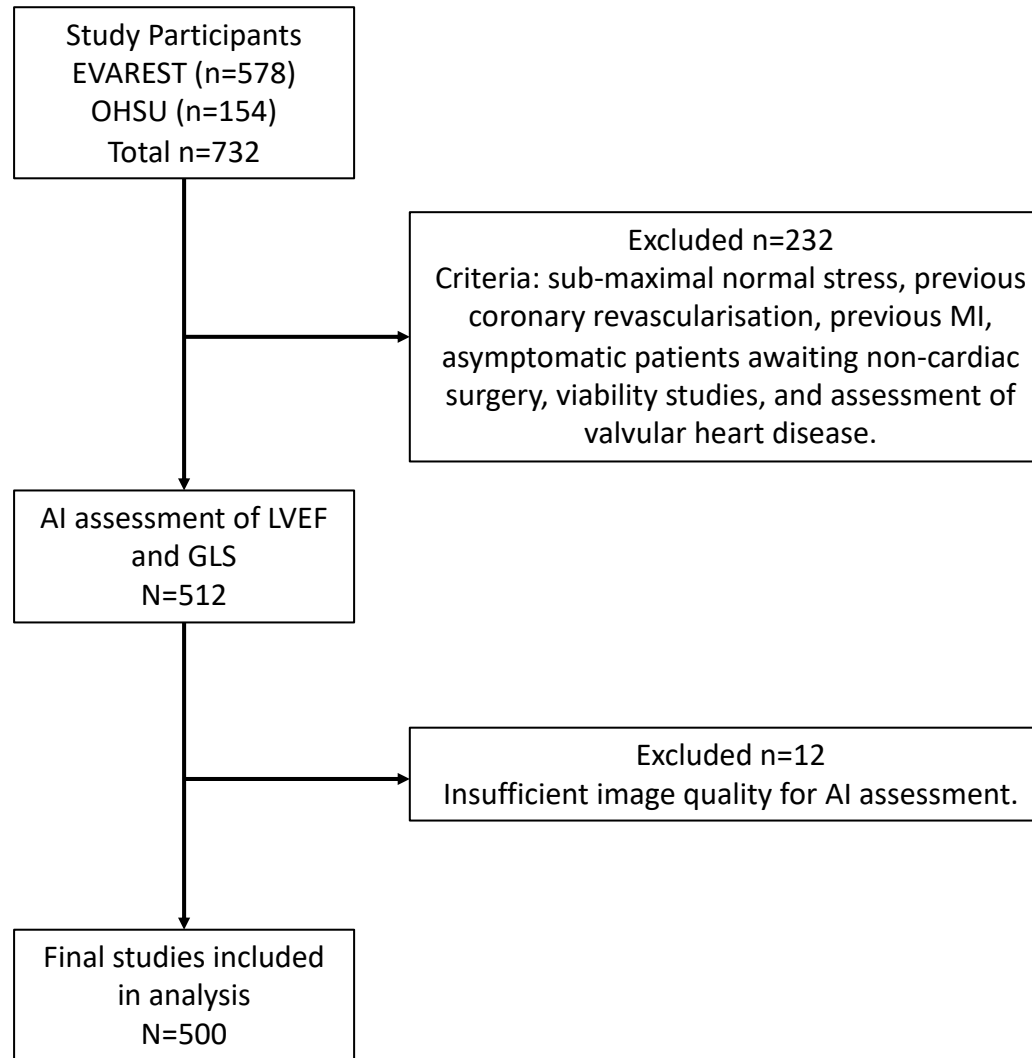

Supplementary Table 1. Wall motion score reproducibility.

|                            | All<br>(n = 20)<br>ICC (95% CI) | Ischaemic only<br>(n=12)<br>ICC (95% CI) |
|----------------------------|---------------------------------|------------------------------------------|
| Inter-operator variability | 0.88 (72, 95)                   | 0.76 (35,92)                             |
| Intra-operator variability | 0.94 (0.86, 0.98)               | 0.88 (0.64, 0.96)                        |

**Supplementary Table 2. Extent, significance and management of significant CAD in study population.** PCI, percutaneous coronary intervention. CABG, coronary artery bypass graft.

|                                                                 |   | All        | Non-ischaemic ( <i>n</i> =370) |                                  | Ischaemic ( <i>n</i> =130)     |                                  |
|-----------------------------------------------------------------|---|------------|--------------------------------|----------------------------------|--------------------------------|----------------------------------|
|                                                                 |   |            | Normal AI<br>systolic function | Abnormal AI<br>systolic function | Normal AI<br>systolic function | Abnormal AI<br>systolic function |
| n, (%age of participants)                                       |   | 500 (100%) | 239 (48%)                      | 131 (26%)                        | 29 (48%)                       | 101 (20%)                        |
| Angiography, n (%age)                                           |   | 118 (24%)  | 5 (3%)                         | 6 (5%)                           | 18 (62%)                       | 89 (88%)                         |
| Significant CAD, n (%age of angiograms)                         |   | 74 (63%)   | 2 (40%)                        | 2 (33%)                          | 6 (33%)                        | 64 (63%)                         |
| Vessels with significant<br>CAD, n (%age of<br>significant CAD) | 1 | 34 (29%)   | 0 (0%)                         | 1 (50%)                          | 4 (67%)                        | 29 (45%)                         |
|                                                                 | 2 | 30 (25%)   | 2 (100%)                       | 0 (0%)                           | 1 (17%)                        | 27 (42%)                         |
|                                                                 | 3 | 10 (8%)    | 0 (0%)                         | 1 (50%)                          | 1 (17%)                        | 8 (13%)                          |

**Supplementary Table 3. Haemodynamic response during SE.** HR, heart rate; APMHR, age-predicted maximum HR, sBP, systolic blood pressure; dBP, diastolic blood pressure; RPP, rate-pressure product

|                           |                |              | No CAD ( <i>n</i> =426) | Significant CAD ( <i>n</i> =74) | <i>P</i> -value |
|---------------------------|----------------|--------------|-------------------------|---------------------------------|-----------------|
| All SEs                   | HR (beats/min) | Baseline     | 76 ± 14                 | 74 ± 13                         | 0.238           |
|                           |                | Peak         | 140 ±14                 | 132 ± 17                        | <0.001          |
|                           |                | %age APMHR   | 89 ± 8                  | 87 ± 10                         | 0.079           |
|                           | sBP (mmHg)     | Baseline     | 140 ± 21                | 142 ± 21                        | 0.434           |
|                           |                | Peak         | 150 ± 33                | 169 ± 30                        | <0.001          |
|                           | dBP (mmHg)     | Baseline     | 77 ± 13                 | 78 ± 12                         | 0.759           |
|                           |                | Peak         | 74 ± 16                 | 80 ± 16                         | 0.004           |
| Peak RPP (beats·mmHg/min) |                | 21101 ± 5258 | 22482 ± 5037            | 0.04                            |                 |
| Dobutamine SEs            | HR (beats/min) | Baseline     | 77 ± 14                 | 73 ± 14                         | 0.2             |
|                           |                | Peak         | 138 ± 14                | 132 ± 12                        | 0.009           |
|                           |                | %age APMHR   | 89 ± 9                  | 88 ± 9                          | 0.574           |
|                           | sBP (mmHg)     | Baseline     | 141 ± 22                | 141 ± 27                        | 0.065           |
|                           |                | Peak         | 141 ± 27                | 158 ± 29                        | 0.002           |
|                           | dBP (mmHg)     | Baseline     | 76 ± 13                 | 78 ± 14                         | 0.518           |
|                           |                | Peak         | 70 ± 15                 | 73 ± 11                         | 0.384           |

|                     |                           |            |              |              |                  |
|---------------------|---------------------------|------------|--------------|--------------|------------------|
|                     | Peak RPP (beats.mmHg/min) |            | 19458 ± 4033 | 20791 ± 4495 | 0.09             |
| <b>Exercise SEs</b> | HR (beats/min)            | Baseline   | 74 ± 14      | 75 ± 14      | 0.975            |
|                     |                           | Peak       | 146 ± 15     | 134 ± 21     | <b>&lt;0.001</b> |
|                     |                           | %age APMHR | 91 ± 8       | 87 ± 12      | <b>0.024</b>     |
|                     | sBP (mmHg)                | Baseline   | 136 ± 16     | 137 ± 18     | 0.640            |
|                     |                           | Peak       | 180 ± 34     | 177 ± 28     | 0.716            |
|                     | dBP (mmHg)                | Baseline   | 80 ± 11      | 77 ± 10      | 0.236            |
|                     |                           | Peak       | 87 ± 14      | 86 ± 16      | 0.694            |
|                     | Peak RPP (beats.mmHg/min) |            | 26150 ± 5146 | 23679 ± 5108 | <b>0.024</b>     |

**Supplementary Table 4. Freedom from significant CAD between different participant groups over the 12 months.** Participant groups are shown as graphed in the Kaplan-Meier curves shown in Figure 3. Normal AI systolic function at peak is defined as peak GLS  $\leq$  or peak LVEF  $\geq$  64%; abnormal AI systolic function at peak is defined as peak GLS  $>$  -17.2% and peak LVEF  $<$  64%. CI, confidence interval

| Figure | Participant group                                        | %age | 95% CI     | <i>P</i> -value |
|--------|----------------------------------------------------------|------|------------|-----------------|
| 3A     | Peak LVEF $\geq$ 64%                                     | 95%  | 92% – 97%  | <0.001          |
|        | Peak LVEF $<$ 64%                                        | 58%  | 49% – 65%  |                 |
| 3B     | Peak GLS $\leq$ 17.2%                                    | 95%  | 92% – 98%  | 0.007           |
|        | Peak GLS $>$ 17.2%                                       | 67%  | 59% – 73%  |                 |
| 3C     | Normal AI systolic function at peak                      | 94%  | 91% – 96%  | <0.001          |
|        | Abnormal AI systolic function at peak                    | 54%  | 43% – 62%  |                 |
| 3D     | Non-ischaemic                                            | 99%  | 97% – 100% | 0.01            |
|        | Ischaemic                                                | 32%  | 23% – 42%  |                 |
| 3E     | Non-ischaemic with normal AI systolic function at peak   | 99%  | 97% – 100% | <0.001          |
|        | Non-ischaemic with abnormal AI systolic function at peak | 98%  | 94% – 100% |                 |
|        | Ischaemic with normal AI systolic function at peak       | 68%  | 42% – 84%  |                 |
|        | Ischaemic with abnormal AI systolic function at peak     | 23%  | 14% – 33%  |                 |

**Supplementary Figure 2.** Comparing of the incremental benefit of incorporating AI-calculated LV systolic function at peak stress to standard clinical assessment using bootstrapping of logistic regression models.

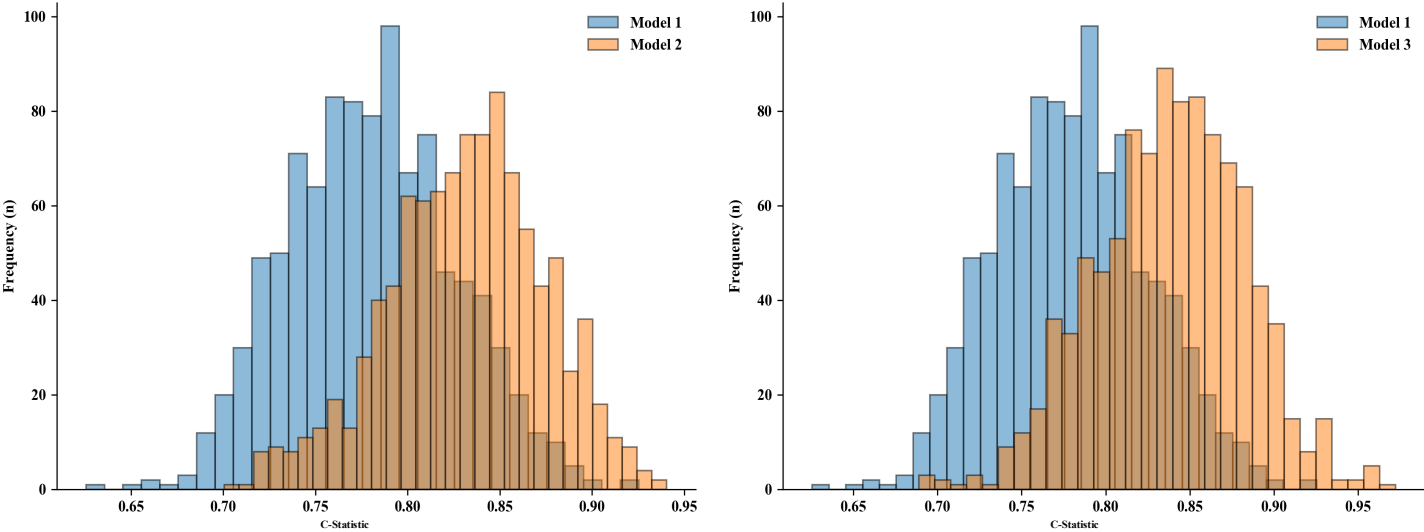

Supplement: oeac059_Supplemenatry_Data [file oeac059_supplemenatry_data.pdf]
